# Supplementary material for: Evidence for the association between FTO gene variants and vitamin B12 concentrations in an Asian Indian population
Source: PubMed Central journal article supplement (PMC6728975; doi:10.1186/s12263-019-0649-3), 2019-09-05
Supplement: 12263_2019_649_MOESM1_ESM.pdf [file 12263_2019_649_MOESM1_ESM.pdf]

**Supplementary Table 1: Baseline characteristics of the CURES study participants: Comparison of NGT, Pre-diabetics and T2D individuals**

| Characteristic                 | n   | Participants with normal glucose tolerance (NGT) | n   | Pre-diabetics | P value * | n   | Participants with type 2 diabetes (T2D) | P value ** |
|--------------------------------|-----|--------------------------------------------------|-----|---------------|-----------|-----|-----------------------------------------|------------|
| Age (yrs)                      | 300 | 48.2 ± 11.9                                      | 300 | 48.4 ± 11.7   | 0.849     | 300 | 53.6 ± 11.0                             | <0.001     |
| BMI (kg/m <sup>2</sup> )       | 300 | 25.8 ± 5.0                                       | 300 | 27.4 ± 5.2    | <0.001    | 299 | 26.9 ± 4.6                              | 0.010      |
| WC (cm)                        | 300 | 85.9 ± 11.4                                      | 300 | 89.6 ± 11.1   | <0.001    | 298 | 90.3 ± 10.1                             | <0.001     |
| Hip (cm)                       | 300 | 96.4 ± 11.0                                      | 300 | 98.7 ± 11.6   | 0.015     | 298 | 97.6 ± 9.6                              | 0.174      |
| WHR                            | 300 | 0.89 ± 0.09                                      | 300 | 0.91 ± 0.09   | 0.022     | 298 | 0.93 ± 0.08                             | <0.001     |
| Fasting plasma glucose (mg/dl) | 274 | 90 ± 6                                           | 283 | 103 ± 18      | <0.001    | 296 | 154 ± 61                                | <0.001     |

|                                      |     |                  |     |                 |        |     |                 |        |
|--------------------------------------|-----|------------------|-----|-----------------|--------|-----|-----------------|--------|
| Fasting serum insulin ( $\mu$ IU/ml) | 300 | $8.3 \pm 5.6$    | 300 | $8.1 \pm 5.6$   | 0.757  | 300 | $11.3 \pm 6.9$  | <0.001 |
| Glycated Haemoglobin (%)             | 300 | $5.7 \pm 0.6$    | 300 | $5.9 \pm 0.6$   | <0.001 | 300 | $8.1 \pm 2.0$   | <0.001 |
| Vitamin B12 levels (pg/mL)           | 300 | $450 \pm 332$    | 300 | $409 \pm 246$   | 0.086  | 300 | $389 \pm 211$   | 0.008  |
| Homocysteine ( $\mu$ mol/L)          | 300 | $13.1 \pm 6.1$   | 300 | $13.3 \pm 7.4$  | 0.650  | 300 | $14.9 \pm 11.7$ | 0.020  |
| Folic (ng/ml)                        | 300 | $10.16 \pm 6.35$ | 300 | $7.99 \pm 6.17$ | <0.001 | 300 | $7.17 \pm 4.11$ | <0.001 |
| Total energy intake (kcal)           | 248 | $2581 \pm 750$   | 124 | $2588 \pm 807$  | 0.932  | 157 | $2548 \pm 767$  | 0.675  |
| Protein energy %                     | 248 | $11.3 \pm 1.2$   | 124 | $11.3 \pm 1.1$  | 0.912  | 157 | $11.4 \pm 1.1$  | 0.328  |
| Carbohydrate energy %                | 248 | $64.1 \pm 6.5$   | 124 | $64.8 \pm 5.5$  | 0.284  | 157 | $64.4 \pm 5.5$  | 0.657  |
| Fat Energy %                         | 248 | $24.0 \pm 4.8$   | 124 | $23.5 \pm 4.4$  | 0.299  | 157 | $23.9 \pm 4.5$  | 0.879  |
| Total Fibre (g)                      | 248 | $31.9 \pm 10.7$  | 124 | $31.1 \pm 10.8$ | 0.510  | 157 | $32.2 \pm 11.0$ | 0.832  |

|                         |     |                |     |                |       |     |                |                    |
|-------------------------|-----|----------------|-----|----------------|-------|-----|----------------|--------------------|
| Physical Activity Level | 228 | Low (77.6%)    | 105 | Low (82.9%)    | 0.230 | 133 | Low (85.7%)    | 0.143 <sup>a</sup> |
|                         |     | Medium (21.1%) |     | Medium (14.3%) |       |     | Medium (12.3%) |                    |
|                         |     | High (1.3%)    |     | High (2.9%)    |       |     | High (1.5%)    |                    |

Data shown are represented as means  $\pm$  SD

P values were calculated by using the Independent t test

\*P values for the differences in the means/ proportions between NGT and pre-diabetic individuals

\*\* P values for the differences in the means/ proportions between NGT and T2D individuals

<sup>a</sup>P values were calculated by using the Chi Squared test

Abbreviations: CURES Chennai Urban Rural Epidemiological Study; BMI Body mass index; WC waist circumference; WHR waist to hip ratio
