# Supplementary material for: Evidence for the association between FTO gene variants and vitamin B12 concentrations in an Asian Indian population
Source: PubMed Central journal article supplement (PMC6728975; doi:10.1186/s12263-019-0649-3), 2019-09-05
Supplement: 12263_2019_649_MOESM2_ESM.pdf [file 12263_2019_649_MOESM2_ESM.pdf]

**Supplementary Table 2: Interaction between the *FTO*-GRS and lifestyle factors on vitamin B12, folic acid, homocysteine and obesity traits**

|                                                                 | BMI (kg/m <sup>2</sup> ) | WC (cm)      | Vitamin B12(pg/mL) | Homocysteine (μmol/L) | Folic acid (ng/ml) |
|-----------------------------------------------------------------|--------------------------|--------------|--------------------|-----------------------|--------------------|
| <b>Interaction between the GRS and carbohydrate energy (%)</b>  | -0.08 ± 0.09             | 0.02 ± 0.11  | 1.40 ± 3.55        | -0.03 ± 0.13          | 0.01 ± 0.10        |
| P value                                                         | †0.387                   | 0.882        | 0.694              | 0.83                  | 0.952              |
| <b>Interaction between the GRS and Fat energy (%)</b>           | 0.23 ± 0.12              | 0.18 ± 0.15  | 0.98 ± 4.87        | -0.07 ± 0.18          | 0.09 ± 0.14        |
| P value                                                         | †0.052                   | 0.225        | 0.841              | 0.709                 | 0.539              |
| <b>Interaction between the GRS and Protein energy (%)</b>       | 0.37 ± 0.50              | 0.77 ± 0.59  | 6.10 ± 19.95       | 0.03 ± 0.75           | 0.20 ± 0.58        |
| P value                                                         | †0.451                   | 0.196        | 0.76               | 0.968                 | 0.728              |
| <b>Interaction between the GRS and Fibre (g)</b>                | 0.08 ± 0.05              | 0.14 ± 1.49  | 1.68 ± 1.90        | -0.01 ± 0.07          | 0.04 ± 0.05        |
| P value                                                         | †0.081                   | 0.925        | 0.376              | 0.898                 | 0.503              |
| <b>Interaction between the GRS and physical activity levels</b> | 1.14 ± 1.16              | -0.14 ± 1.46 | 23.02 ± 51.29      | 0.99 ± 1.93           | 0.46 ± 1.51        |
| P value                                                         | †0.327                   | 0.924        | 0.654              | 0.609                 | 0.760              |

Values are beta coefficients ± standard errors.

P values were obtained by using a general linear model adjusted for age, BMI, Type 2 diabetes status, Type 2 diabetes medication and sex

† P values were obtained by using a general linear model adjusted for age, Type 2 diabetes status, Type 2 diabetes medication and sex

Abbreviations: BMI body mass index; WC waist circumference; WHR waist to hip ratio
