# Supplementary material for: Evidence for the association between FTO gene variants and vitamin B12 concentrations in an Asian Indian population
Source: PubMed Central journal article supplement (PMC6728975; doi:10.1186/s12263-019-0649-3), 2019-09-05
Supplement: 12263_2019_649_MOESM3_ESM.pdf [file 12263_2019_649_MOESM3_ESM.pdf]

**Supplementary Table 3: Interaction between the *FTO*-GRS and lifestyle factors on obesity**

|                     | Interaction between the GRS and dietary factors on Obesity |                             |                        |                     | Interaction between the GRS and physical activity levels on Obesity |
|---------------------|------------------------------------------------------------|-----------------------------|------------------------|---------------------|---------------------------------------------------------------------|
|                     | GRS * Fat energy %                                         | GRS * carbohydrate energy % | GRS * protein energy % | GRS * fibre (g)     |                                                                     |
| Odds Ratio (95% CI) | 1.096 (0.980-1.227)                                        | 0.962 (0.889-1.040)         | 1.113 (0.729-1.762)    | 1.034 (0.984-1.086) | 1.026 (0.263-4.003)                                                 |
| P Value             | 0.109                                                      | 0.326                       | 0.578                  | 0.182               | 0.970                                                               |

Values are beta coefficients  $\pm$  standard errors.

P values were obtained by using binary logistic regression adjusted for age, T2D, Type 2 diabetes medication and sex
